# Supplementary material
Source: ML conference proceedings conference paper supplement (https://openreview.net/forum?id=79shW3z5Eaq)
Supplement: supplementary_material [file attachment]

## **Supplementary material for Datasets for Online Controlled Experiments**

The dataset, its schema and accompanying datasheet (with the intended uses, plus the hosting, licensing, and maintenance plan), and the experiment code are available on Open Science Framework: <https://osf.io/64jsb/> (DOI 10.17605/OSF.IO/64JSB). The project (and dataset) is open-sourced under a CC-By Attribution 4.0 International license.
